# Supplementary material for: Characterization of tongue coating microbiome from patients with colorectal cancer
Source: PubMed Central journal article supplement — J Oral Microbiol. 2024 Apr 26;16(1):2344278. doi: 10.1080/20002297.2024.2344278 (PMC11057396; doi:10.1080/20002297.2024.2344278), 2024-04-26
Supplement: ZJOM_A_2344278_SM8214.pdf [file ZJOM_A_2344278_SM8214.pdf]

Table S1 Summary of all samples in this study with relevant clinical information

| SampleID | Group | Date of Sample<br>Collection | Age | Gender | Gender | BMI         | RBC<br>(10 <sup>12</sup> /L) | WBC<br>(10 <sup>9</sup> /L) | PLT<br>(10 <sup>9</sup> /L) | NEU% | LY%  | ALT<br>(U/L) | AST<br>(U/L) | TP<br>(g/L) | ALB<br>(g/L) | GLB<br>(g/L) | Cr<br>(μmol/L) |
|----------|-------|------------------------------|-----|--------|--------|-------------|------------------------------|-----------------------------|-----------------------------|------|------|--------------|--------------|-------------|--------------|--------------|----------------|
| TG_001   | CP    | 2021-11-25                   | 63  | 0      | female | 25.84776822 | 4.28                         | 4.60                        | 204                         | 75.2 | 20.1 | 11           | 14           | 67.9        | 41.7         | 26.2         | 66             |
| TG_002   | CP    | 2022-03-09                   | 64  | 1      | male   | 24.79338843 | 5.04                         | 6.06                        | 170                         | 53.7 | 31.9 | 16           | 17           | 75.6        | 46.3         | 29.3         | 57             |
| TG_003   | CP    | 2022-01-17                   | 52  | 0      | female | 31.17913832 | 3.92                         | 4.57                        | 231                         | 51   | 43.8 | 39           | 27           | 67.4        | 42.7         | 24.7         | 49             |
| TG_004   | CP    | 2022-01-25                   | 36  | 1      | male   | 26.02510174 | 5.44                         | 4.84                        | 210                         | 55.2 | 35.3 | 16           | 19           | 78.5        | 44.8         | 33.7         | 66             |
| TG_005   | CP    | 2021-12-09                   | 71  | 1      | male   | 27.43801653 | 5.04                         | 5.05                        | 197                         | 58.2 | 32.4 | 17           | 20           | 71.6        | 46.1         | 25.5         | 73             |
| TG_006   | CP    | 2021-12-23                   | 64  | 0      | female | 21.08281329 | 5.21                         | 11.69                       | 399                         | 93.2 | 5.2  | 37           | 24           | 67.7        | 38.9         | 28.8         | 28             |
| TG_007   | CRC   | 2021-12-06                   | 69  | 0      | female | 22.09478833 | 3.91                         | 7.39                        | 321                         | 63.2 | 26.8 | 14           | 16           | 68.4        | 39.6         | 28.8         | 89             |
| TG_008   | CRC   | 2021-12-16                   | 73  | 0      | female | 24.03460984 | 4.00                         | 8.32                        | 244                         | 78.7 | 14.7 | 19           | 45           | 70.2        | 38.1         | 32.1         | 60             |
| TG_009   | CRC   | 2022-05-13                   | 61  | 1      | male   | 15.625      | 3.66                         | 15.04                       | 440                         | 77.7 | 13.2 | 24           | 22           | 76.9        | 38.7         | 38.2         | 81             |
| TG_010   | CP    | 2021-12-13                   | 65  | 0      | female | 19.33372992 | 4.64                         | 7.04                        | 221                         | 57.7 | 34   | 12           | 22           | 77.5        | 44.6         | 32.9         | 74             |
| TG_011   | CP    | 2022-03-14                   | 56  | 0      | female | 19.08327246 | 4.57                         | 4.14                        | 216                         | 49.8 | 43   | 12           | 17           | 72.7        | 43.5         | 29.2         | 54             |
| TG_012   | CRC   | 2022-03-24                   | 71  | 1      | male   | 23.24459454 | 4.09                         | 2.18                        | 135                         | 35.6 | 47.1 | 19           | 28           | 62.4        | 38.8         | 23.6         | 52             |
| TG_013   | CRC   | 2022-01-19                   | 57  | 1      | male   | 26.953125   | 4.37                         | 4.99                        | 196                         | 70.7 | 16.3 | 27           | 33           | 75.3        | 41.9         | 33.4         | 85             |
| TG_014   | CP    | 2022-03-11                   | 69  | 0      | female | 20.8456944  | 4.14                         | 6.23                        | 176                         | 67.6 | 24.5 | 10           | 14           | 66.9        | 38.2         | 28.7         | 74             |
| TG_015   | CP    | 2022-04-02                   | 61  | 1      | male   | 22.85714286 | 4.37                         | 5.83                        | 261                         | 70.9 | 19   | 10           | 17           | 71.7        | 44.4         | 27.3         | 66             |
| TG_016   | CP    | 2021-12-13                   | 56  | 1      | male   | 24.50894577 | 5.13                         | 4.20                        | 171                         | 73.2 | 21.8 | 16           | 16           | 71.9        | 44.6         | 27.3         | 98             |
| TG_017   | CP    | 2022-03-09                   | 51  | 1      | male   | 24.48979592 | 4.44                         | 7.65                        | 270                         | 56.3 | 35   | 13           | 14           | 65.3        | 36.5         | 28.8         | 92             |
| TG_018   | CP    | 2022-01-04                   | 59  | 1      | male   | 16.67820069 | 4.99                         | 7.09                        | 277                         | 61.2 | 27.1 | 14           | 13           | 69.2        | 42.8         | 26.4         | 87             |
| TG_019   | CP    | 2022-03-25                   | 66  | 0      | female | 24.22145329 | 4.41                         | 4.81                        | 230                         | 47.2 | 40.3 | 26           | 23           | 73.4        | 45.4         | 28           | 49             |
| TG_020   | CP    | 2022-03-28                   | 41  | 1      | male   | 25.4580659  | 5.31                         | 6.73                        | 239                         | 42.4 | 39.8 | 15           | 17           | 74          | 41.6         | 32.4         | 77             |
| TG_021   | CP    | 2022-03-18                   | 52  | 1      | male   | 23.0400202  | 5.44                         | 8.98                        | 253                         | 66.8 | 23.3 | 45           | 23           | 74.2        | 47.6         | 26.6         | 89             |
| TG_022   | CP    | 2021-12-20                   | 63  | 0      | female | 25.29937595 | 4.14                         | 4.59                        | 213                         | 62.3 | 27.1 | 29           | 34           | 69.5        | 41.8         | 27.7         | 71             |
| TG_023   | CP    | 2021-11-30                   | 48  | 0      | female | 24.84098009 | 4.20                         | 6.27                        | 236                         | 69.4 | 22.3 | 14           | 17           | 66.7        | 41           | 25.7         | 76             |
| TG_024   | CP    | 2022-04-02                   | 52  | 1      | male   | 20.2812331  | 4.40                         | 7.45                        | 243                         | 58   | 33.3 | NA           | NA           | NA          | NA           | NA           | 72             |
| TG_025   | CP    | 2021-12-13                   | 70  | 0      | female | 23.828125   | 3.40                         | 4.40                        | 257                         | 47.6 | 42.1 | 14           | 22           | 68.1        | 40.8         | 27.3         | 59             |
| TG_026   | CRC   | 2022-03-11                   | 72  | 1      | male   | 22.03856749 | 4.28                         | 7.20                        | 227                         | 55.8 | 24.5 | 12           | 20           | 68.5        | 42.4         | 26.1         | 81             |
| TG_027   | CRC   | 2021-12-15                   | 67  | 1      | male   | 23.66143862 | 4.27                         | 8.87                        | 267                         | 63.9 | 26.4 | 12           | 17           | 71.9        | 43.3         | 28.6         | 100            |
| TG_028   | CRC   | 2021-12-02                   | 75  | 1      | male   | 22.86236854 | 4.03                         | 8.17                        | 220                         | 65.1 | 24   | 10           | 17           | 66.8        | 37.3         | 29.5         | 100            |
| TG_029   | CRC   | 2022-03-15                   | 69  | 1      | male   | 19.72318339 | 5.44                         | 4.81                        | 327                         | 73.6 | 17.9 | 3            | 17           | 65.8        | 36.2         | 29.6         | 58             |
| TG_030   | CRC   | 2022-03-14                   | 62  | 1      | male   | 30.11621315 | 4.67                         | 4.99                        | 198                         | 58.6 | 26.1 | 16           | 17           | 65.4        | 42.2         | 23.2         | 88             |

|        |     |            |    |   |        |             |      |       |     |      |      |      |      |      |      |      |      |
|--------|-----|------------|----|---|--------|-------------|------|-------|-----|------|------|------|------|------|------|------|------|
| TG_031 | CRC | 2022-01-19 | 55 | 0 | female | 20.95717116 | 4.86 | 6.06  | 215 | 67.2 | 24.5 | 37   | 29   | 71.7 | 42.2 | 29.5 | 55   |
| TG_032 | CRC | 2021-12-09 | 61 | 1 | male   | 20.2020202  | 3.14 | 8.92  | 244 | 81.5 | 9.6  | 24   | 34   | 47.3 | 19.7 | 27.6 | 103  |
| TG_033 | CRC | 2021-12-13 | 62 | 0 | female | 21.50446956 | 4.24 | 9.90  | 424 | 70.3 | 17.9 | 6    | 11   | 71.2 | 34.9 | 36.3 | 57   |
| TG_034 | CRC | 2021-12-15 | 42 | 1 | male   | 22.49134948 | 5.20 | 7.17  | 193 | 63.1 | 29.8 | 23   | 19   | 78.7 | 47.9 | 30.8 | 111  |
| TG_035 | CRC | 2022-04-07 | 63 | 1 | male   | 27.734375   | 6.71 | 9.89  | 354 | 60.4 | 25.2 | 15   | 19   | 73.7 | 44.3 | 29.4 | 92   |
| TG_036 | CRC | 2022-01-18 | 75 | 1 | male   | 27.39817568 | 4.41 | 6.17  | 231 | 70.8 | 21.3 | 31   | 27   | 70   | 44.4 | 25.6 | 98   |
| TG_037 | CRC | 2022-03-15 | 68 | 0 | female | 21.484375   | 4.37 | 7.72  | 431 | 62.9 | 30.1 | 6    | 16   | 67.5 | 41.5 | 26   | 73   |
| TG_038 | CRC | 2021-11-24 | 75 | 1 | male   | 24.97398543 | 3.42 | 8.92  | 703 | 83.7 | 10.5 | 6    | 11   | 72.5 | 37.3 | 35.2 | 42   |
| TG_039 | CRC | 2022-03-22 | 59 | 0 | female | 22.42727156 | 3.88 | 8.67  | 349 | 74.1 | 18.4 | 8    | 16   | 74.6 | 40.3 | 34.3 | 71   |
| TG_040 | CRC | 2022-04-01 | 48 | 0 | female | 20.95717116 | 4.58 | 5.85  | 323 | 63.8 | 26.4 | 11   | 12   | 69   | 38.7 | 30.3 | 47   |
| TG_041 | CRC | 2021-12-01 | 34 | 0 | female | 19.45858295 | 3.77 | 5.52  | 298 | 64.1 | 26.5 | 5    | 15   | 63.7 | 41.6 | 22.1 | 55   |
| TG_042 | CRC | 2021-12-29 | 68 | 1 | male   | 22.47658689 | 5.22 | 9.19  | 222 | 73.2 | 17.7 | 13   | 18   | 71.3 | 42.2 | 29.1 | 88   |
| TG_043 | CRC | 2022-03-18 | 56 | 1 | male   | 25.59373706 | 4.94 | 7.54  | 412 | 50.7 | 42.8 | 10   | 14   | 66.9 | 40.1 | 26.8 | 96   |
| TG_044 | CRC | 2021-12-02 | 67 | 0 | female | 28.44444444 | 3.97 | 11.86 | 405 | 80.9 | 13.7 | 25   | 26   | 68.7 | 35.7 | 33   | 64   |
| TG_045 | CRC | 2022-01-21 | 82 | 1 | male   | 27.54820937 | 2.89 | 12.29 | 350 | 80.2 | 7.9  | 11   | 15   | 62.8 | 33.9 | 28.9 | 170  |
| TG_046 | CRC | 2021-12-21 | 63 | 1 | male   | 20.86111966 | 4.91 | 4.92  | 195 | 49.5 | 36.3 | 10   | 15   | 64.9 | 38   | 26.9 | 92   |
| TG_047 | CRC | 2022-03-16 | 41 | 1 | male   | 21.14631991 | 3.98 | 5.16  | 211 | 44.5 | 47   | 13   | 15   | 64.9 | 40.6 | 24.3 | 96   |
| TG_048 | CRC | 2022-01-20 | 39 | 0 | female | 18.49112426 | 4.54 | 10.94 | 473 | 83.8 | 10.4 | 3    | 19   | 65.6 | 29.5 | 36.1 | 46   |
| TG_049 | HC  | 2021-12-03 | 59 | 1 | male   | 22.87197232 | 4.32 | 6.25  | 234 | 67.2 | 24.2 | 19.3 | 18.7 | 68.4 | 46.4 | 22   | 78.1 |
| TG_050 | HC  | 2021-12-24 | 55 | 1 | male   | 23.05175491 | 4.70 | 6.87  | 258 | 56.4 | 32.5 | 22.5 | 25.7 | 73.5 | 44.5 | 29   | 72.7 |
| TG_051 | HC  | 2022-03-29 | 57 | 0 | female | 23.0625112  | 4.71 | 6.88  | 216 | 60.9 | 31   | 21.3 | 23.6 | 77.5 | 42.7 | 34.8 | 68   |
| TG_052 | HC  | 2022-05-16 | 59 | 1 | male   | 21.59539936 | 6.21 | 3.63  | 305 | 61.4 | 28   | 11.9 | 12.7 | 73.7 | 46.5 | 27.2 | 86.1 |
| TG_053 | HC  | 2022-03-22 | 57 | 1 | male   | 25.74285608 | 4.38 | 5.01  | 255 | 52.3 | 39.3 | 20.8 | 20.4 | 75   | 46.9 | 28.1 | 80.9 |
| TG_054 | HC  | 2021-12-08 | 59 | 0 | female | 26.65471838 | 5.72 | 6.97  | 352 | 67   | 24.4 | 11.8 | 18.9 | 72.6 | 47.1 | 25.5 | 56.9 |
| TG_055 | HC  | 2021-11-29 | 55 | 1 | male   | 27.91208103 | 5.25 | 5.30  | 284 | 56.9 | 32.4 | 23.3 | 21.3 | 71.8 | 44   | 27.8 | 75.4 |
| TG_056 | HC  | 2022-03-31 | 60 | 1 | male   | 18.39162397 | 4.32 | 6.52  | 192 | 64.5 | 24.9 | 13.5 | 19.2 | 74.6 | 43.6 | 31   | 78.5 |
| TG_057 | HC  | 2021-12-10 | 56 | 0 | female | 26.63891779 | 4.42 | 9.49  | 314 | 61.2 | 32.6 | 26.8 | 23.5 | 70.2 | 44.4 | 25.8 | 59.5 |
| TG_058 | HC  | 2022-04-07 | 59 | 0 | female | 18.28356615 | 4.00 | 3.49  | 176 | 51   | 42.5 | 10.9 | 19.5 | 70.6 | 45   | 25.6 | 69.7 |
| TG_059 | HC  | 2021-12-08 | 55 | 1 | male   | 22.25754398 | 4.96 | 3.41  | 219 | 60.7 | 23.7 | 11   | 14.7 | 65.4 | 43.1 | 22.3 | 96.2 |
| TG_060 | HC  | 2022-01-12 | 59 | 0 | female | 18.51638281 | 4.19 | 6.98  | 283 | 55.8 | 32.6 | 9.8  | 15   | 71.8 | 44.5 | 27.3 | 65.3 |
| TG_061 | HC  | 2022-05-16 | 56 | 1 | male   | 21.02113116 | 5.48 | 7.06  | 202 | 61.9 | 31.5 | 28.7 | 27.3 | 79.2 | 50   | 29.2 | 93   |
| TG_062 | HC  | 2022-04-02 | 59 | 0 | female | 19.00194856 | 4.30 | 4.90  | 176 | 51.2 | 41.1 | 12.3 | 16.9 | 70.8 | 44.4 | 26.4 | 67   |
| TG_063 | HC  | 2022-01-28 | 59 | 1 | male   | 24.50617284 | 4.78 | 6.55  | 207 | 60.2 | 23.8 | 10.8 | 17.2 | 71.7 | 46.1 | 25.6 | 76.8 |

|        |     |            |    |   |        |             |      |       |     |       |      |      |      |      |      |      |      |
|--------|-----|------------|----|---|--------|-------------|------|-------|-----|-------|------|------|------|------|------|------|------|
| TG_064 | HC  | 2021-11-25 | 58 | 1 | male   | 24.10086533 | 4.84 | 5.26  | 249 | 53.3  | 34.1 | 18.7 | 18.5 | 72.5 | 45.8 | 26.7 | 87   |
| TG_065 | HC  | 2021-12-31 | 58 | 0 | female | 22.1875     | 4.49 | 4.82  | 286 | 53.1  | 37.9 | 18   | 17.9 | 83.2 | 47.7 | 35.5 | 47.1 |
| TG_066 | HC  | 2021-12-08 | 55 | 1 | male   | 26.66459073 | 5.13 | 5.86  | 235 | 51.3  | 39   | 18.8 | 16.3 | 68.7 | 42.2 | 26.5 | 88   |
| TG_067 | HC  | 2021-12-20 | 59 | 1 | male   | 20.84663205 | 4.31 | 4.66  | 209 | 57.1  | 25.3 | 13.7 | 21.4 | 71.3 | 44.4 | 26.9 | 88.5 |
| TG_068 | HC  | 2021-12-23 | 55 | 1 | male   | 24.96716097 | 5.12 | 10.88 | 306 | 53.5  | 38.3 | 18.1 | 12.1 | 76.5 | 43.3 | 33.2 | 64.5 |
| TG_069 | HC  | 2021-12-20 | 59 | 0 | female | 23.81460389 | 4.29 | 6.21  | 290 | 59.1  | 31.9 | 29.8 | 23   | 70.4 | 45.2 | 25.2 | 59   |
| TG_070 | HC  | 2022-03-23 | 57 | 1 | male   | 28.48739783 | 4.72 | 7.33  | 230 | 58    | 31.1 | 22.6 | 16.2 | 81.2 | 45.1 | 36.1 | 75.3 |
| TG_071 | HC  | 2022-03-30 | 55 | 0 | female | 20.46479682 | 4.31 | 6.79  | 278 | 57.4  | 27.6 | 16.7 | 23.8 | 75   | 44.7 | 30.3 | 62.6 |
| TG_072 | HC  | 2022-03-21 | 60 | 0 | female | 25.19132653 | 4.35 | 4.60  | 216 | 45    | 50.3 | 22.1 | 25.1 | 70   | 42.2 | 27.8 | 58.4 |
| TG_073 | HC  | 2021-12-23 | 56 | 1 | male   | 24.67552049 | 5.71 | 6.65  | 235 | 64.9  | 26.1 | 28.6 | 24.2 | 71.6 | 46   | 25.6 | 77.4 |
| TG_074 | HC  | 2022-01-25 | 55 | 1 | male   | 26.6766698  | 4.89 | 5.68  | 229 | 64.3  | 30   | 26.3 | 22   | 72   | 44.5 | 27.5 | 73.5 |
| TG_075 | HC  | 2022-03-22 | 56 | 0 | female | 25.00740529 | 4.15 | 3.99  | 189 | 59.4  | 27.9 | 22.9 | 22.5 | 70.2 | 44.9 | 25.3 | 55.6 |
| TG_076 | HC  | 2022-03-31 | 55 | 1 | male   | 23.60650784 | 5.03 | 6.82  | 333 | 55.8  | 34   | 17.7 | 29.3 | 77.6 | 44.7 | 32.9 | 94.3 |
| TG_077 | HC  | 2022-01-25 | 56 | 1 | male   | 20.89965398 | 4.68 | 7.34  | 211 | 52.6  | 37.1 | 13.8 | 19.8 | 69.3 | 42.6 | 26.7 | 98.9 |
| TG_078 | HC  | 2022-05-13 | 58 | 1 | male   | 24.53512397 | 5.52 | 5.25  | 232 | 59.2  | 29.9 | 28.8 | 25   | 69.8 | 42.6 | 27.2 | 91.4 |
| TG_079 | CP  | 2022-01-26 | 60 | 0 | female | 26.03749399 | 4.40 | 6.59  | 259 | 53.6  | 32.6 | NA   | NA   | NA   | NA   | NA   | NA   |
| TG_080 | CP  | 2021-12-07 | 61 | 1 | male   | 26.60971255 | 4.87 | 6.70  | 206 | 56.9  | 36.4 | NA   | NA   | NA   | NA   | NA   | NA   |
| TG_081 | CP  | 2021-12-02 | 59 | 1 | male   | 25.64891762 | 5.15 | 5.53  | 159 | 58.3  | 29.8 | NA   | NA   | NA   | NA   | NA   | NA   |
| TG_082 | CP  | 2021-12-31 | 54 | 0 | female | 25.77777778 | 4.31 | 5.35  | 241 | 61.3  | 30.8 | NA   | NA   | NA   | NA   | NA   | NA   |
| TG_083 | CP  | 2021-12-14 | 39 | 1 | male   | 26.12244898 | 5.19 | 7.08  | 272 | 60.1  | 28.8 | NA   | NA   | NA   | NA   | NA   | NA   |
| TG_084 | CP  | 2022-04-07 | 42 | 1 | male   | 20.38062284 | 5.14 | 7.96  | 240 | 61.6  | 25.8 | NA   | NA   | NA   | NA   | NA   | NA   |
| TG_085 | CP  | 2021-12-23 | 29 | 1 | male   | 19.84126984 | 5.31 | 6.20  | 231 | 54.4  | 37.3 | NA   | NA   | NA   | NA   | NA   | NA   |
| TG_086 | CRC | 2021-11-29 | 71 | 1 | male   | 26.25958475 | 4.15 | 13.11 | 279 | 13.64 | 1.02 | 20   | 14   | 58.2 | 37.4 | 20.8 | 76   |
| TG_087 | CP  | 2021-11-29 | 68 | 0 | female | 25.18210198 | 4.42 | 5.23  | 278 | 59.9  | 33.6 | 37   | 22   | 60.3 | 40.1 | 20.2 | 38   |
| TG_088 | CRC | 2022-03-11 | 70 | 0 | female | 24.5603263  | 4.66 | 12.87 | 320 | 79    | 13.4 | 8    | 16   | 69.6 | 37.1 | 32.5 | 68   |
| TG_089 | CP  | 2021-12-31 | 36 | 1 | male   | 24.34175829 | 4.94 | 7.08  | 379 | 58.9  | 33.2 | NA   | NA   | NA   | NA   | NA   | NA   |
| TG_090 | CP  | 2022-03-25 | 35 | 1 | male   | 25.56495392 | 5.46 | 6.72  | 236 | 44    | 44   | NA   | NA   | NA   | NA   | NA   | NA   |

HC: Healthy controls, CP: Patients with colorectal polyps (CP), CRC: Patients with colorectal cancer; BMI:Body mass index; RBC: Red blood cell count; WBC: White blood cell count; PLT: Platelet count; NEU%:Neutrophil%; LY%: Lymphocyte%; ALT:Alanine amiotransferase; AST:Aspartate aminotransferase; TP: Total protein; ALB:Albumin; GLB:Globulin; Cr: Creatinine.

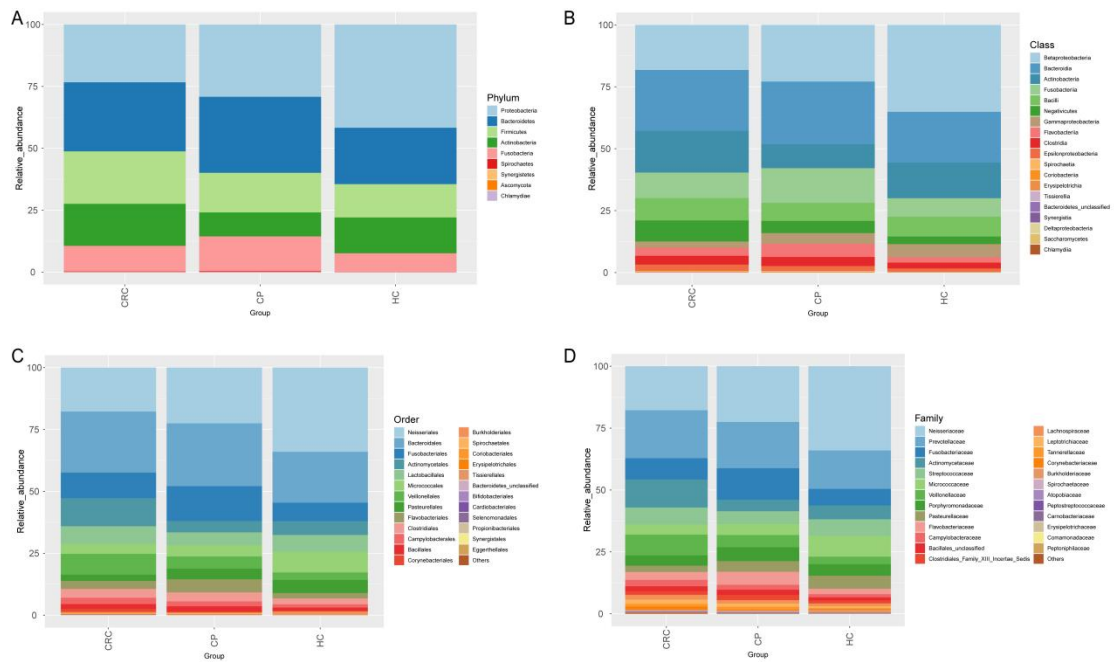

**Supplementary Figure S1.** Microbiome composition of the three groups from the phylum to family level. (A) phylum level. (B) class level. (C) order level. (D) family level. HC: Healthy controls, CP: Patients with colorectal polyps (CP), CRC: Patients with colorectal cancer

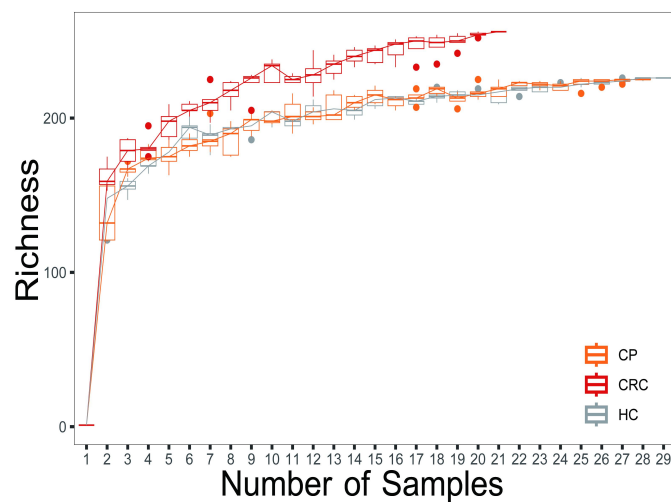

**Supplementary Figure S2.** Species accumulation curves of samples from three groups at the species level.

### Cladogram

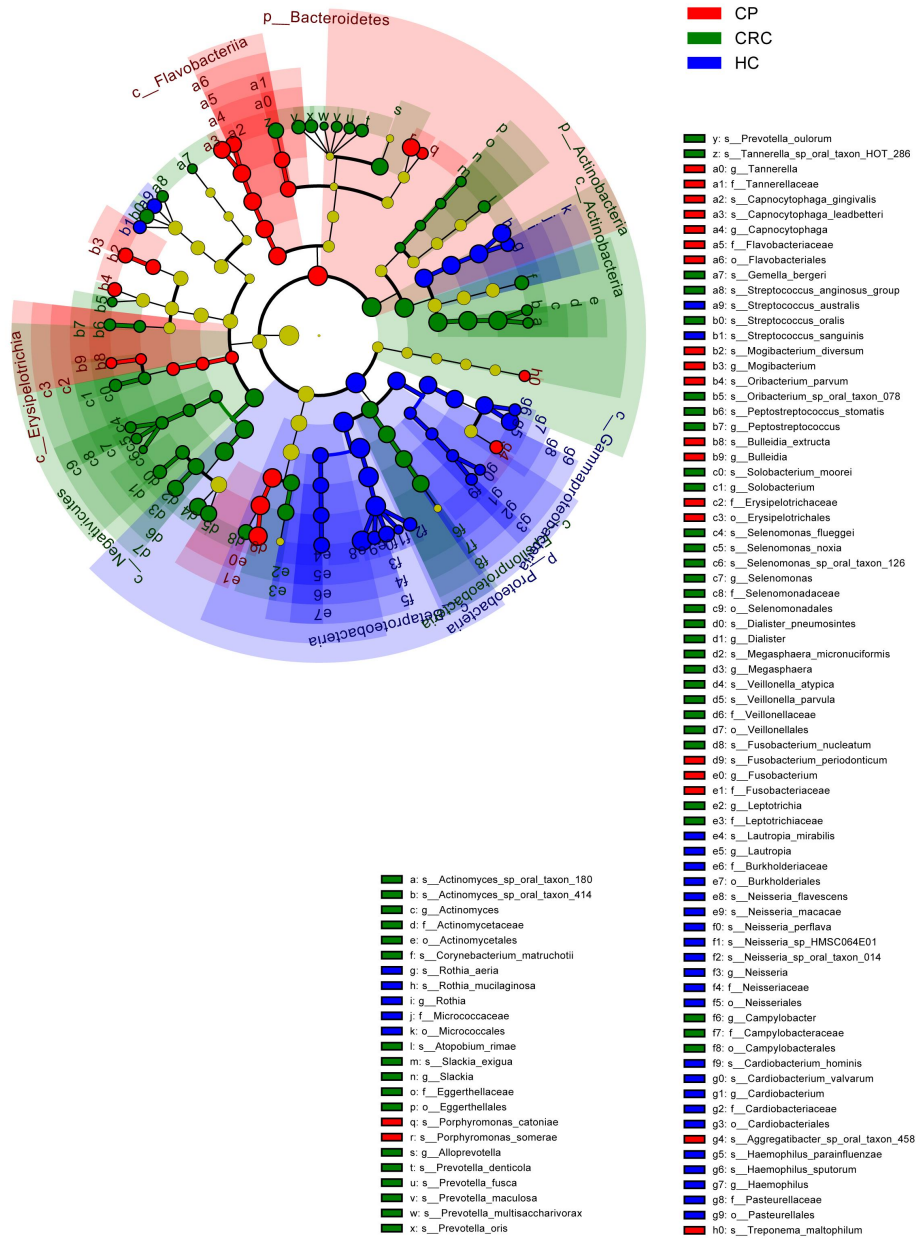

**Supplementary Figure S3.** Cladograms of bacterial lineages with obvious differences between three groups at various levels from phylum to species. HC: Healthy controls, CP: Patients with colorectal polyps, CRC: Patients with colorectal cancer
